# Supplementary material for: Equilibrium-fluctuation-analysis of single liposome binding events reveals how cholesterol and Ca2+ modulate glycosphingolipid trans-interactions
Source: PubMed Central journal article supplement — Sci Rep. 2013 Mar 14;3:1452. doi: 10.1038/srep01452 (PMC3596795; doi:10.1038/srep01452), 2013-03-14
Supplement: srep01452-s1.pdf [file srep01452-s1.pdf]

## Supplementary Information

### Equilibrium fluctuation analysis of single liposome binding events reveals how cholesterol and $\text{Ca}^{2+}$ -ions modulate glycosphingolipid *trans*-interactions

Angelika Kunze, Marta Bally, Fredrik Höök and Göran Larson

#### FRAP

FRAP experiments were carried out employing the Nikon Eclipse Ti-E inverted microscope using a 60X magnification oil immersion objective. Three different lipid compositions were studied: (i) 99 wt% POPC and 1 wt% NBD-PC (**SLB 1**), (ii) 94 wt% POPC, 5 wt%  $\text{Le}^x$  and 1 wt% NBD-PC (**SLB 2**), and (iii) 92 wt% POPC, 5 wt%  $\text{Le}^x$ , 1 wt% NBD-PC, and 2 wt% cholesterol (**SLB 3**). SLBs were prepared on glass-bottom microtiter wells as described above. After formation bilayers were rinsed thoroughly with TRIS with 0 or 10 mM  $\text{CaCl}_2$ , respectively. Prior to bleaching 10 images of the SLBs were taken to compensate for uneven illumination over the sample. Thereafter a spot ( $\sim 25 \mu\text{m}$  in diameter) was bleached for 2 s with a diode pumped solid state laser at 475 nm (BWB-475-20E; B&W Tek Inc., Newark DE, USA), followed by a series of 100 images taken at 1 s intervals. Diffusion was determined from five discrete spots each SLB. Image analysis was performed using the Matlab script “frap-analysis” described in detail by Jonsson et al.<sup>1</sup>

Cholesterol-free and cholesterol containing SLBs were found to be mobile in TRIS with and without  $\text{Ca}^{2+}$ -ions. Table S1 summarizes the diffusion coefficients  $D$  found for SLBs containing  $\text{Le}^x$  and cholesterol in buffer with 0 or 10 mM  $\text{CaCl}_2$ .

**Table S1: Diffusion coefficient of the different SLBs in TRIS with 0 or 10 mM  $\text{CaCl}_2$ .**

|                                                  |                       | $D / \mu\text{m}^2\text{s}^{-1}$ |
|--------------------------------------------------|-----------------------|----------------------------------|
| <b>POPC</b>                                      | 0 mM $\text{CaCl}_2$  | $1.96 \pm 0.15$                  |
|                                                  | 10 mM $\text{CaCl}_2$ | $1.72 \pm 0.08$                  |
| <b>POPC/<math>\text{Le}^x</math></b>             | 0 mM $\text{CaCl}_2$  | $2.14 \pm 0.09$                  |
|                                                  | 10 mM $\text{CaCl}_2$ | $1.66 \pm 0.05$                  |
| <b>POPC/<math>\text{Le}^x</math>/cholesterol</b> | 0 mM $\text{CaCl}_2$  | $1.86 \pm 0.08$                  |
|                                                  | 10 mM $\text{CaCl}_2$ | $1.46 \pm 0.05$                  |

## References

- 1 Jönsson, P., Jonsson, M. P., Tegenfeldt, J. O. & Höök, F. A method improving the accuracy of fluorescence recovery after photobleaching analysis. *Biophys. J.* **95**, 5334-5348 (2008).
